# Supplementary material
Source: PubMed Central journal article supplement (PMC3718214)
Supplement: supp_mct124_mct124supp.pdf [file supp_mct124_mct124supp.pdf]

## SUPPLEMENTARY DATA

FIG. S1. Images of *Taxus baccata* samples used in this work. LA1, LA2, LA3: leafy arils at different stages of development; FA, fleshy green arils; B1, breaker-1 arils; B2, breaker-2 arils; R, red ripe arils.

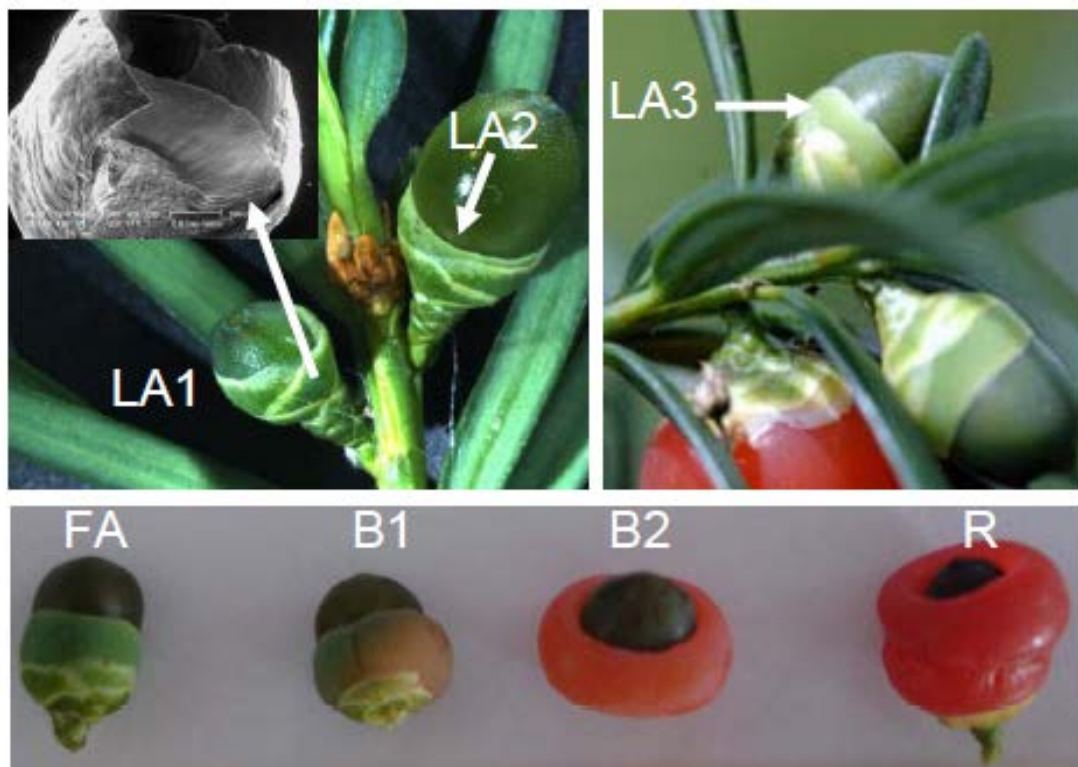

FIG. S2. Characterization of the various Ginkgo samples used in this work.

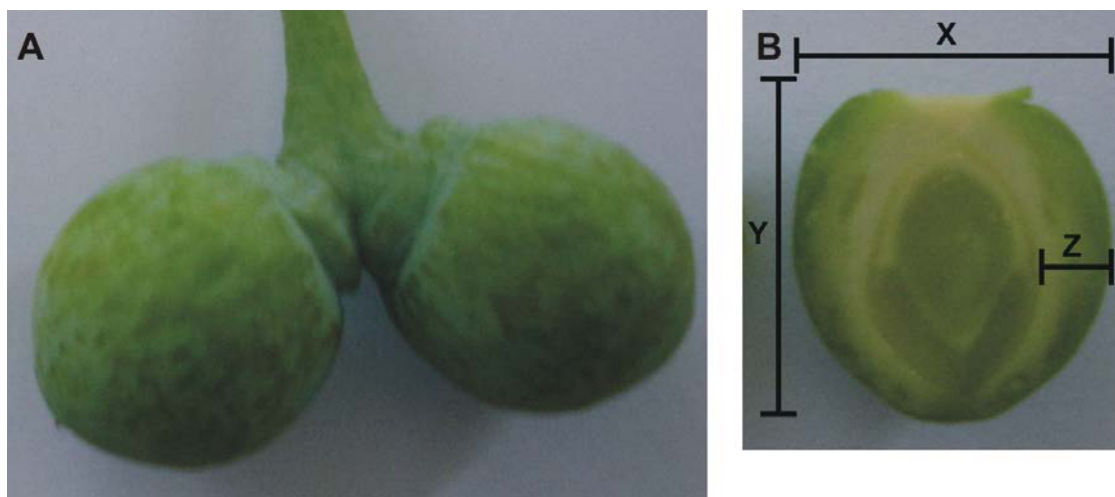

**C**

| SAMPLE | X (cm) | Y (cm) | Z (cm) |
|--------|--------|--------|--------|
| 8/5    | 0,8    | 0,6    | 0,2    |
| 15/5   | 1,0    | 1,0    | 0,3    |
| 23/5   | 1,4    | 1,2    | 0,4    |
| 6/6    | 2,5    | 1,6    | 0,7    |
| 17/7   | 3      | 2,6    | 0,9    |
| 4/8    | 3      | 2,7    | 0,9    |
| 3/9    | 3      | 2,7    | 0,9    |

FIG. S3. Pollen viability assay.

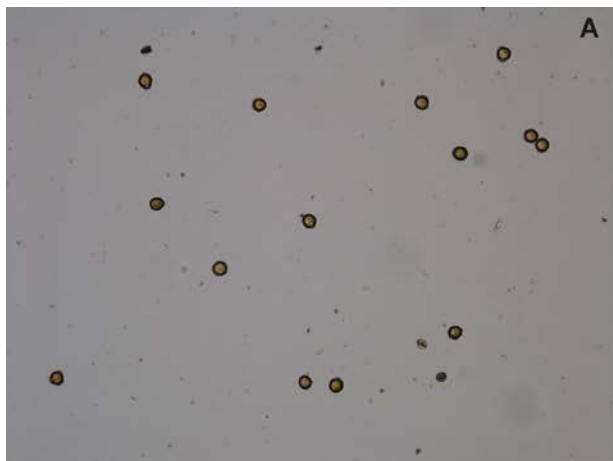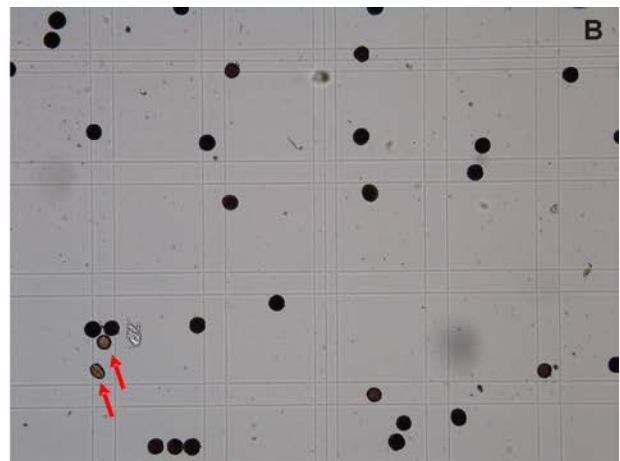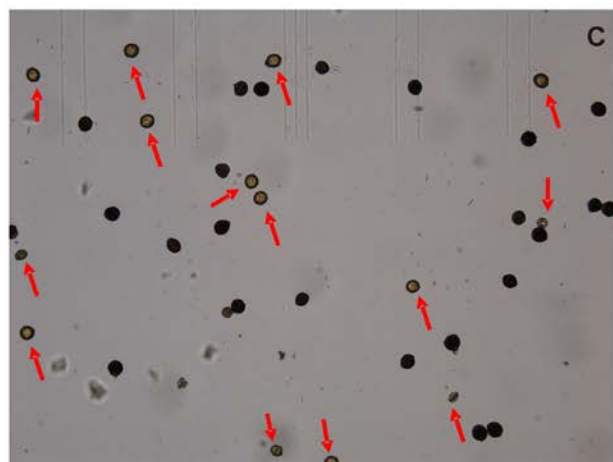

FIG. S4. K-domain analysis of *Arabidopsis thaliana transparent testa 16* (ABS/TT16), *Ginkgo biloba B-sister* (GBM10), *Taxus baccata B-sister* (TbBS), *Arabidopsis thaliana GORDITA* (GOA/AGL63).

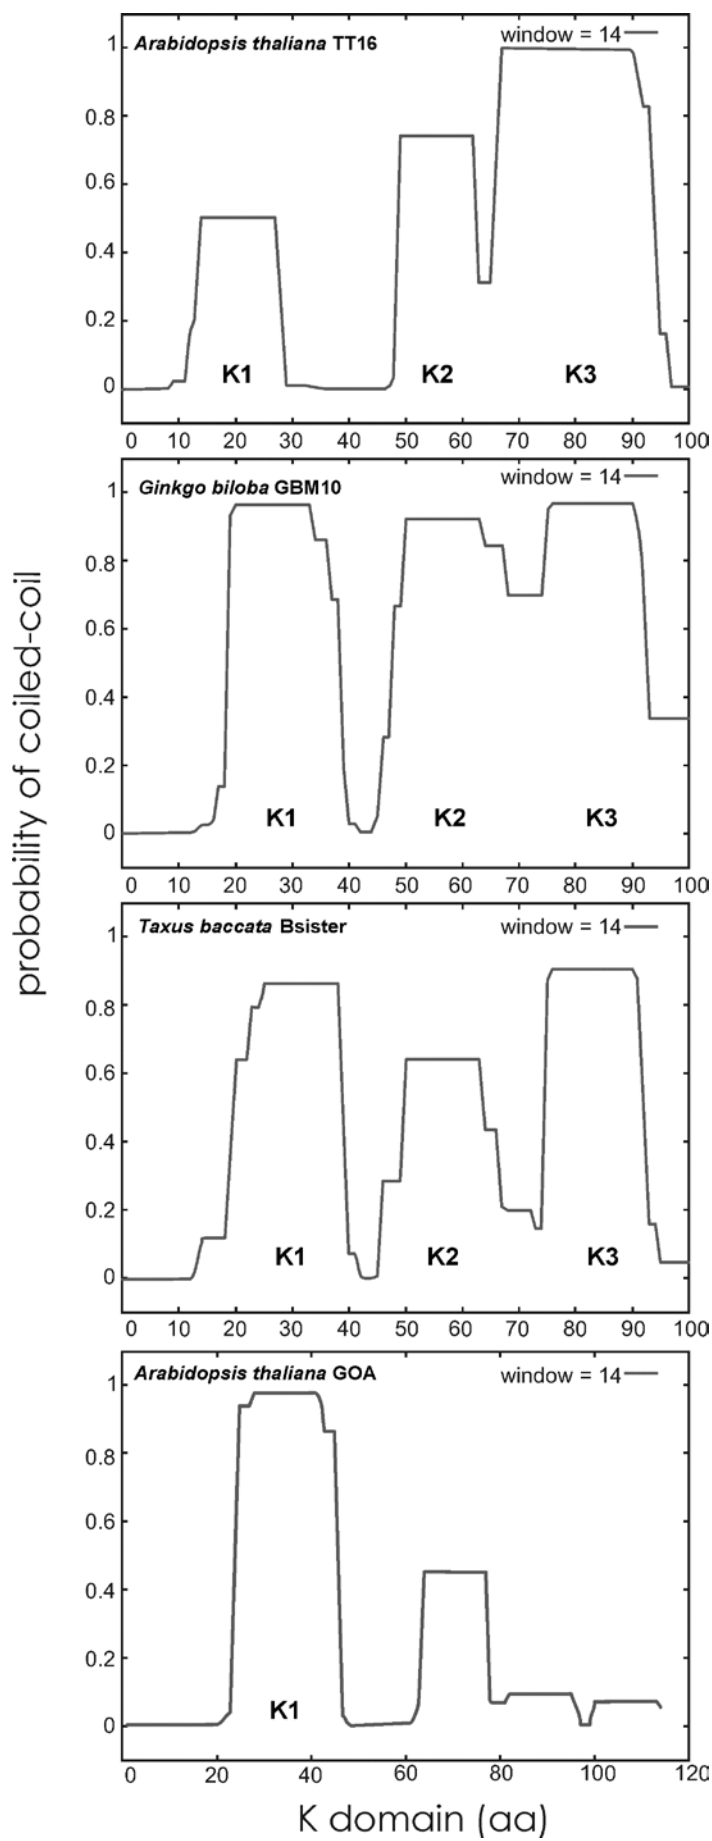

TABLE S1. List of primers used in this work.

|                                                | OLIGONUCLEOTIDE SEQUENCE 5'-3'                                                        | NOTE                                                                        |
|------------------------------------------------|---------------------------------------------------------------------------------------|-----------------------------------------------------------------------------|
| <b><i>Taxus baccata</i> Bs</b>                 |                                                                                       |                                                                             |
| TbBsdegfor2<br>TbBsdegrev3                     | TCCAGCATGARRAAGRTYMTMGA<br>TCCTGSARRTTYGGYTGWKTGKG                                    | primers used for the amplification of most part of k-domain and C- domain   |
| RQVmadfor<br>TbBsrealrev                       | GRCARRTNACNTTYKSNAARMG<br>CGCCGCCGCCTCTTGTGT                                          | primers used for the amplification of most part of MADS domain and K-domain |
| TbBsrealfor<br>AUAP                            | GTCCGCCAATCGTGTTCGTGCTA<br>GGCCACGCGTCGACTAGTAC (supplied by the kit)                 | 3' RACE                                                                     |
| TbBs5raoerev6                                  | GGAGAAGATGATGAGCCCAAGTT                                                               | 5' RACE. Primer used for cDNA synthesis                                     |
| TbBs5raoerev7<br>5'race abridged anchor primer | GTGACTTGCTGTTGGTGCTGTTT<br>GGCCACGCGTCGACTAGTACGGGIIGGGIIGGGIIG (supplied by the kit) | 5' RACE                                                                     |
| TbBsintfor<br>TbBsintrev                       | AGGAGACATGGGACGCGGAAAGAT<br>CAGACTAGAGTTGTAGCGGTGCTC                                  | primers used to amplify and to control the coding region                    |
| TbITSfor<br>TbITSrev                           | AAGTGTCGCGGGCAGGTAATG<br>CGTGGGGGAAAATCGGAGAAA                                        | primers used to normalized the expression                                   |
| TbBsrealfor<br>TbBsrealrev                     | GTCCGCCAATCGTGTTCGTGCTA<br>CGCCGCCGCCTCTTGTGT                                         | primers used to study the expression                                        |
| <b><i>Ginkgo biloba</i> GbMADS10</b>           |                                                                                       |                                                                             |
| Gbitsfor<br>Gbitsrev                           | GCGGTCGGGAAGGATGTGC<br>GCCGAGGGGAAATGCGAGAAG                                          | primers used to normalized the expression                                   |
| GbMADS10realtimefor<br>GbMADS10realtimeev      | TCAAGCTGCAGTGAAGGTGTGGT<br>TTGGCTGTGTTGGCTGGAGACG                                     | primers used to study the expression                                        |

TABLE S2. Primers, vectors and enzymes used to prepare the probes for the *in situ* hybridization analysis.

| Name  | Primer forward        | Primer reverse         | Lenght | Vector                  | Enzymes used to linearized |
|-------|-----------------------|------------------------|--------|-------------------------|----------------------------|
| TbBS  | GCCCGGCTATGCGAGTTT    | CGCCGCCGCCTCTTGTGT     | 300bp  | pGEM-T Easy (Promega)   | Sall, NcoI                 |
| GBM10 | AAGTCGAGCAAATCGTGTTCG | TTGGCTGTGTTGGCTGGAGACG | 261bp  | pCRII TOPO (invitrogen) | BamHI, XhoI                |
